# Supplementary material
Source: ML conference proceedings conference paper supplement (https://openaccess.thecvf.com/content/ICCV2021/html/Wang_Meta_Learning_on_ICCV_2021_paper.html)
Supplement: Supplementary file 1 [file Wang_Meta_Learning_on_ICCV_2021_supplemental.zip]

## Appendix

### A. Dataset Details

**Miniimagenet** [56] A subset dataset from ImageNet with 100 different classes, each class with 600 images. The meta train/validation/test splits are 64/16/20 classes respectively, following the same splits of [44].

**Omniglot** [34] An image dataset handwritten characters from 50 different alphabets, with each class of 20 examples, following the same setup and data split in [56].

**CUB** [61] A dataset consisting of 200 bird species. Following the same split of [16], the meta train/validation/test splits are of 100/50/50 classes respectively.

**AIRCRAFT** [39] An image dataset for aircraft models consisting of 102 categories, with 100 images per class. Following the split in [58], the dataset is split into 70/15/15 classes for meta- training/validation/test.

**Quickdraw** [28] An image dataset consisting of 50 million black-and-white drawings with 345 categories. Following [35], the dataset is split into 241/52/52 classes for meta-training/validation/test.

**Necessities** *Necessities* Logo images from the large-scale publicly available dataset Logo-2K+ [59]. The dataset is randomly split into 100/41/41 classes for meta- training/validation/test.

### B. Implementation Detail

We use 750 evaluation tasks from each domain for meta testing.  $m = 5$  for constructing the projected space.  $\delta = 1.64$  (corresponds to confidence level of 95%) and window size  $B = 100$  for domain change detection. The meta batch size (number of training tasks at each iteration) is 2.

We approximate each  $\|\nabla_{\theta} \mathcal{L}_{\theta}(\mathcal{T})\|_2 \sim \|\nabla_{x_i} \mathcal{L}_{\theta}(\mathcal{T})\|_2 = G_i$ ; where  $x_i$  is the pre-activation of last layer output of the network as in [29].

### C. Theorem proof

#### Proof

Let  $\mu = \mathbb{E}_{\mathbf{p}(\mathcal{T})} \nabla_{\theta} \mathcal{L}_{\theta}(\mathcal{T})$

$$\begin{aligned} \text{Tr}(\mathbb{V}_{\mathbf{q}}[\Omega]) &= \mathbb{E}_{\mathbf{q}(\mathcal{T})} [(\frac{\mathbf{p}(\mathcal{T})}{\mathbf{q}(\mathcal{T})} \nabla_{\theta} \mathcal{L}_{\theta}(\mathcal{T}) - \mu) \\ &(\frac{\mathbf{p}(\mathcal{T})}{\mathbf{q}(\mathcal{T})} \nabla_{\theta} \mathcal{L}_{\theta}(\mathcal{T}) - \mu)^T] = \mathbb{E}_{\mathbf{q}(\mathcal{T})} [\|\frac{\mathbf{p}(\mathcal{T})}{\mathbf{q}(\mathcal{T})} \nabla_{\theta} \mathcal{L}_{\theta}(\mathcal{T})\|_2^2 - \|\mu\|_2^2] \end{aligned} \quad (15)$$

Table 5: Effect of memory size with order 1

| Algorithm               | 5-Way 1-Shot<br>ACC | 5-Way 5-Shots<br>ACC |
|-------------------------|---------------------|----------------------|
| PNet-RS ( $n = 100$ )   | $36.82 \pm 1.32$    | $54.83 \pm 1.12$     |
| PNet-Ours ( $n = 100$ ) | $42.35 \pm 0.91$    | $59.85 \pm 0.79$     |
| PNet-RS ( $n = 200$ )   | $37.30 \pm 1.21$    | $55.23 \pm 0.87$     |
| PNet-Ours ( $n = 200$ ) | $43.61 \pm 0.86$    | $61.32 \pm 0.68$     |
| PNet-RS ( $n = 300$ )   | $37.76 \pm 1.19$    | $55.79 \pm 0.91$     |
| PNet-Ours ( $n = 300$ ) | $44.32 \pm 0.83$    | $61.67 \pm 0.57$     |
| PNet-RS ( $n = 500$ )   | $38.82 \pm 1.27$    | $55.95 \pm 0.98$     |
| PNet-Ours ( $n = 500$ ) | $44.81 \pm 0.63$    | $62.08 \pm 0.61$     |

By Jensen’s inequality:

$$\begin{aligned} \mathbb{E}_{\mathbf{q}(\mathcal{T})} [\|\frac{\mathbf{p}(\mathcal{T})}{\mathbf{q}(\mathcal{T})} \nabla_{\theta} \mathcal{L}_{\theta}(\mathcal{T})\|_2^2] &\geq \mathbb{E}_{\mathbf{q}(\mathcal{T})} [\|\frac{\mathbf{p}(\mathcal{T})}{\mathbf{q}(\mathcal{T})} \nabla_{\theta} \mathcal{L}_{\theta}(\mathcal{T})\|_2]^2 \\ &= (\mathbb{E}_{\mathbf{p}(\mathcal{T})} [\|\nabla_{\theta} \mathcal{L}_{\theta}(\mathcal{T})\|_2])^2 \end{aligned} \quad (16)$$

The equality holds at  $\mathbf{q}^*(\mathcal{T}) = \frac{\mathbf{p}(\mathcal{T}) \|\nabla_{\theta} \mathcal{L}_{\theta}(\mathcal{T})\|_2}{\int \mathbf{p}(\mathcal{T}) \|\nabla_{\theta} \mathcal{L}_{\theta}(\mathcal{T})\|_2}$ . by plugging the above  $\mathbf{q}^*(\mathcal{T})$  into the covariance expression. ■

### D. Additional Results

#### D.1. New ordering

**Order 1: Omniglot, Aircraft, Necessities, CUB, Quickdraw, MiniImagenet**

To simulate imbalanced domains in streaming setting, each domain on this sequence is trained on 3000, 2000, 4000, 2000, 4000, 40000 steps respectively.

**Order 2: Necessities, CUB, Omniglot, Aircraft, MiniImagenet, Quickdraw**

To simulate imbalanced domains in streaming setting, each domain on this sequence is trained on 6000, 2000, 6000, 3000, 3000, 24000 steps respectively.

**Order 1.** Table 5 shows the results. **Order 2.** Table 6 shows the results.

#### D.2. Effect of domain revisiting

This section shows the results of effect of domain revisiting with domain ordering, **Quickdraw, MiniImagenet, Omniglot, CUB, Quickdraw, Aircraft, Necessities**. The domain Quickdraw is revisited. To simulate imbalanced domains in streaming setting, each domain on this sequence is trained on 5000, 2000, 6000, 2000, 3000, 2000, 24000 steps respectively.

Table 6: Effect of memory size with order 2

| Algorithm               | 5-Way 1-Shot<br>ACC | 5-Way 5-Shots<br>ACC |
|-------------------------|---------------------|----------------------|
| PNet-RS ( $n = 100$ )   | $43.08 \pm 0.79$    | $57.97 \pm 0.87$     |
| PNet-Ours ( $n = 100$ ) | $46.67 \pm 0.61$    | $62.14 \pm 0.50$     |
| PNet-RS ( $n = 200$ )   | $43.36 \pm 0.72$    | $58.23 \pm 0.72$     |
| PNet-Ours ( $n = 200$ ) | $46.95 \pm 0.52$    | $62.83 \pm 0.58$     |
| PNet-RS ( $n = 300$ )   | $44.16 \pm 0.80$    | $58.65 \pm 0.79$     |
| PNet-Ours ( $n = 300$ ) | $47.64 \pm 0.45$    | $63.21 \pm 0.46$     |
| PNet-RS ( $n = 500$ )   | $45.29 \pm 0.82$    | $59.36 \pm 0.85$     |
| PNet-Ours ( $n = 500$ ) | $47.16 \pm 0.49$    | $63.02 \pm 0.46$     |

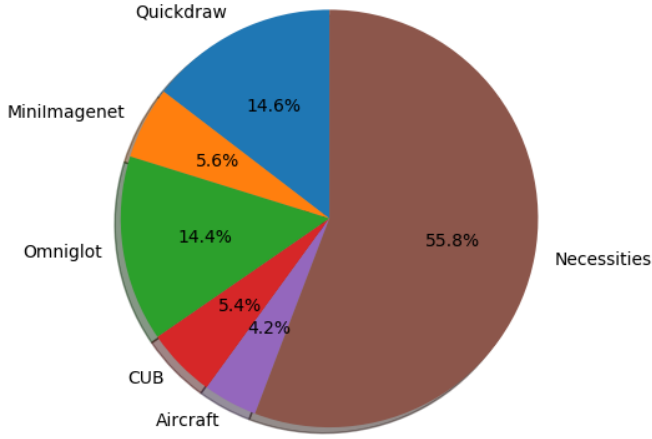

(a) reservoir sampling

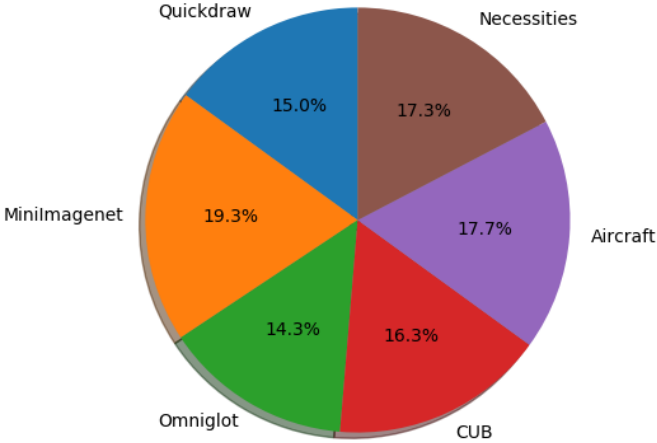

(b) our memory management mechanism

Figure 5: Results of different domain proportion in the memory of our memory management methods and reservoir sampling when meta learning on an imbalanced task stream from three latent domains.

Table 7: Comparisons with PNet-based baselines with domain revisiting

| Algorithm            | 5-Way 1-Shot<br>ACC | 5-Way 5-Shots<br>ACC |
|----------------------|---------------------|----------------------|
| PNet-Sequential      | $32.02 \pm 0.50$    | $49.60 \pm 0.45$     |
| PNet-RS              | $37.31 \pm 1.56$    | $56.29 \pm 1.35$     |
| PNet-Ours            | $40.25 \pm 0.98$    | $60.36 \pm 0.83$     |
| Joint-training       | $52.96 \pm 0.45$    | $68.56 \pm 0.57$     |
| Independent-training | $58.25 \pm 0.36$    | $72.23 \pm 0.29$     |

Table 8: Comparisons with PNet-based baselines with different imbalanced ratio of each domain

| Algorithm            | 5-Way 1-Shot<br>ACC | 5-Way 5-Shots<br>ACC |
|----------------------|---------------------|----------------------|
| PNet-Sequential      | $29.91 \pm 0.71$    | $46.97 \pm 0.65$     |
| PNet-RS              | $34.97 \pm 1.52$    | $54.79 \pm 0.69$     |
| PNet-GSS             | $35.65 \pm 1.28$    | $56.65 \pm 0.81$     |
| PNet-AGEM            | $34.53 \pm 1.36$    | $54.91 \pm 0.73$     |
| PNet-MIR             | $35.09 \pm 1.29$    | $54.56 \pm 0.90$     |
| PNet-MER             | $35.16 \pm 1.32$    | $55.71 \pm 0.78$     |
| PNet-Ours            | $40.57 \pm 0.68$    | $61.53 \pm 0.58$     |
| Joint-training       | $52.96 \pm 0.45$    | $68.56 \pm 0.37$     |
| Independent-training | $58.25 \pm 0.36$    | $72.23 \pm 0.29$     |

### D.3. Effect of different ratios of domains

### D.4. Ablation Study

**Effect of PETS** Figure 6 shows the effect of sampling tasks with PETS.

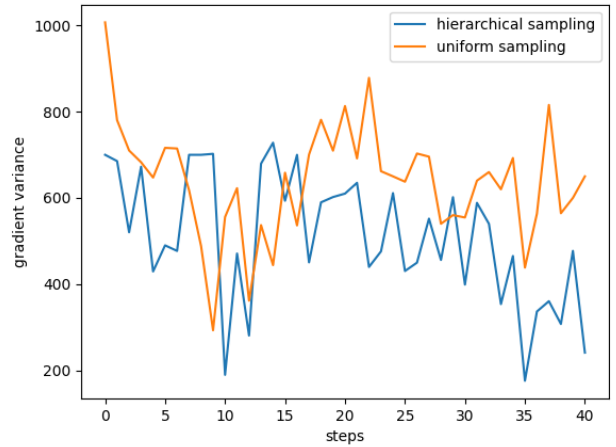

Figure 6: Gradient variance comparison between uniform sampling and PETS, each step (1000 iterations).

Table 9: Effect of Adaptive memory task sampling

| Algorithm                | 5-Way 1-Shot<br>ACC | 5-Way 5-Shots<br>ACC |
|--------------------------|---------------------|----------------------|
| PNet-RS                  | $34.68 \pm 1.96$    | $53.69 \pm 0.76$     |
| PNet-Ours (without PETS) | $38.85 \pm 0.79$    | $57.95 \pm 0.67$     |
| PNet-Ours (with PETS)    | $41.10 \pm 0.42$    | $60.37 \pm 0.32$     |

**Effect of memory management mechanism** Table 9 shows the effect of the proposed memory management mechanism.
